# Supplementary material for: Genomic ecology of Marine Group II, the most common marine planktonic Archaea across the surface ocean
Source: PubMed Central journal article supplement (PMC6741140; doi:10.1002/mbo3.852), 2019-07-02

(a)

ABC TRANSPORTERS

Prokaryotic-type ABC transporters

Mineral and organic ion transporters

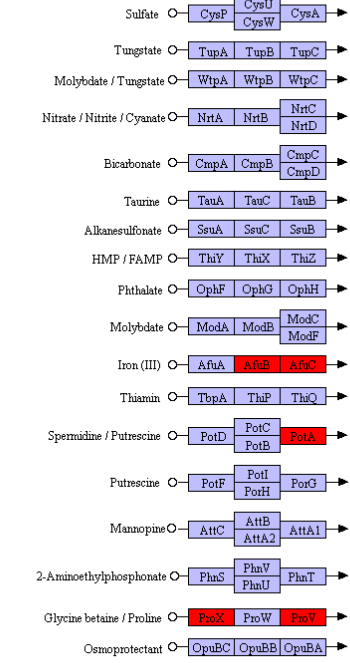

Oligosaccharide, polyol, and lipid transporters

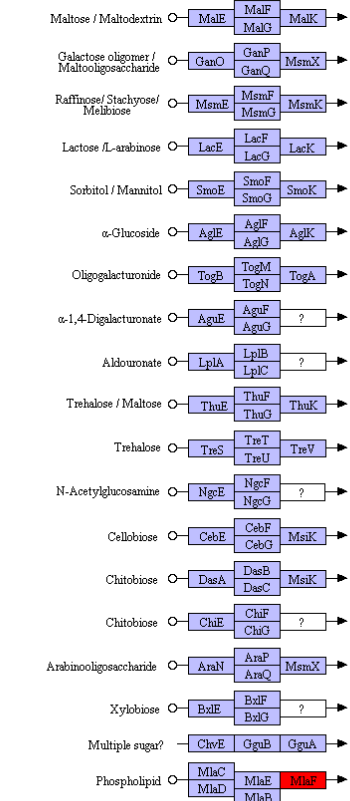

Monosaccharide transporters

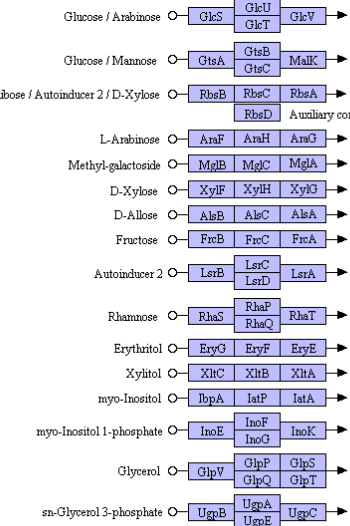

Phosphate and amino acid transporters

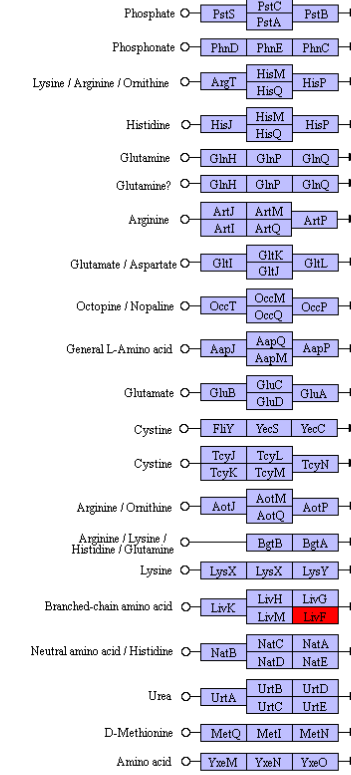

Peptide and nickel transporters

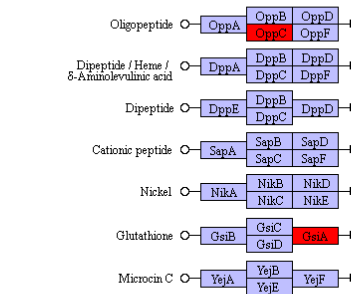

Metallic cation, iron-siderophore and vitamin B12 transporters

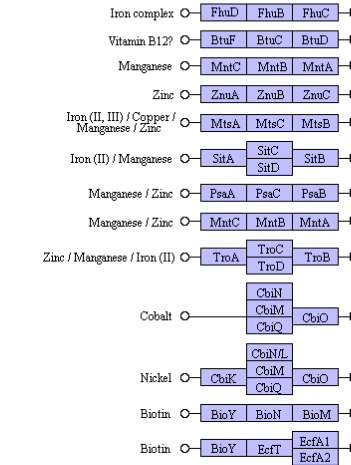

ABC-2 and other transporters

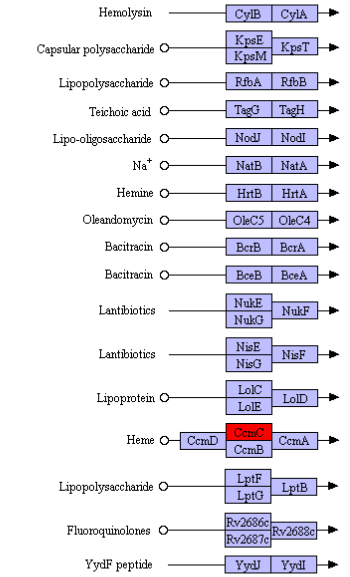

ABC-2 -type components without transporting function

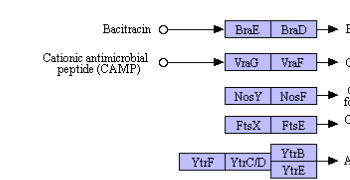

Eukaryotic-type ABC transporters

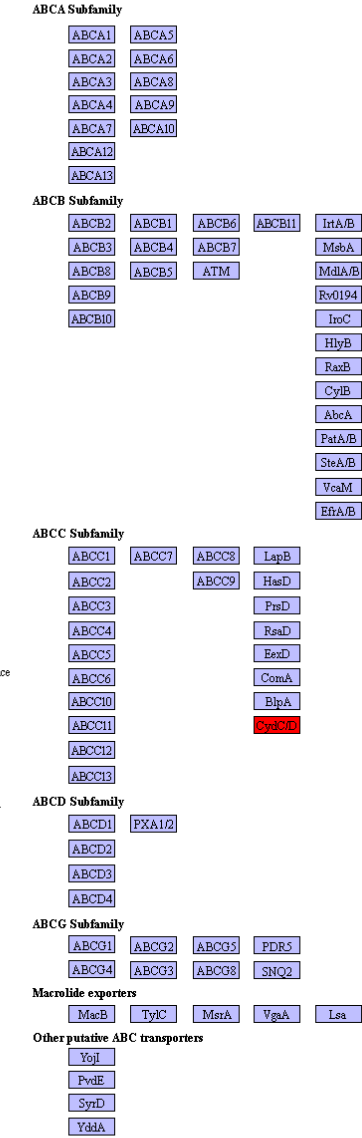

(b)

ABC TRANSPORTERS

Prokaryotic-type ABC transporters

Mineral and organic ion transporters

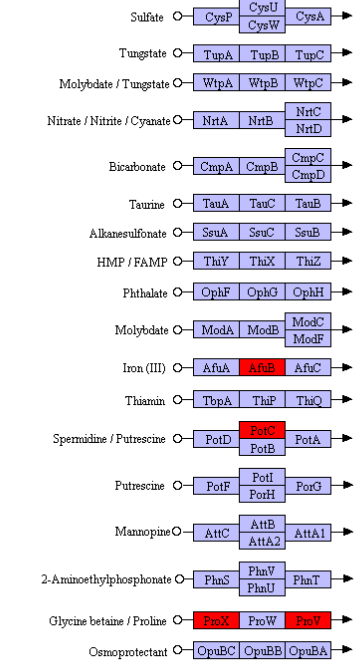

Oligosaccharide, polyol, and lipid transporters

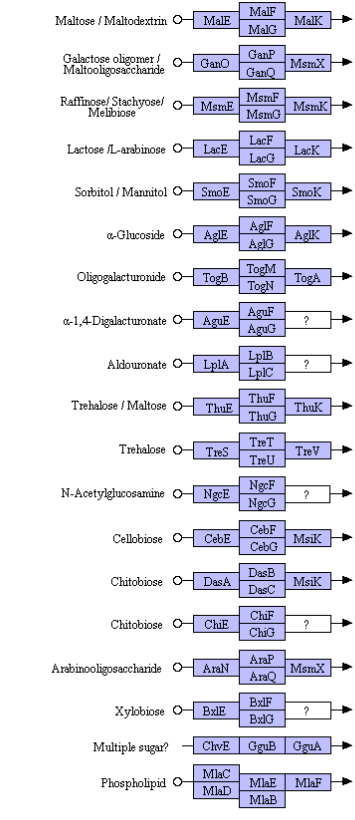

Monosaccharide transporters

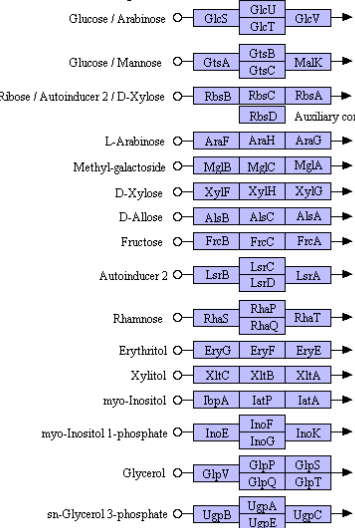

Phosphate and amino acid transporters

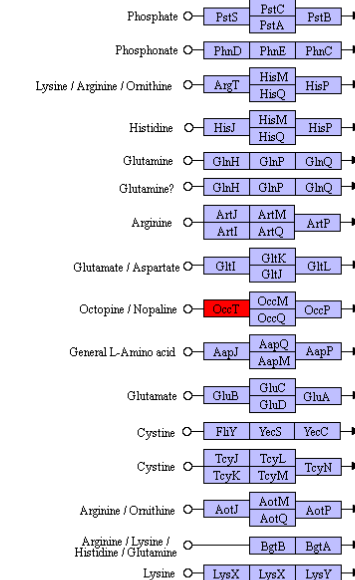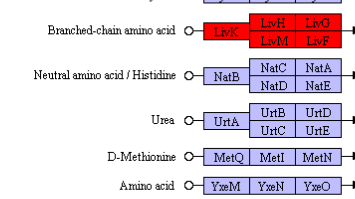

Peptide and nickel transporters

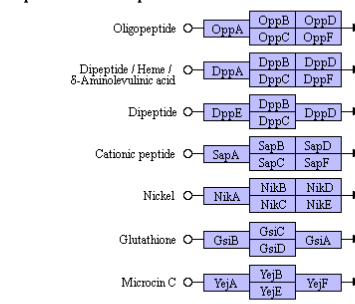

Metallic cation, iron-siderophore and vitamin B12 transporters

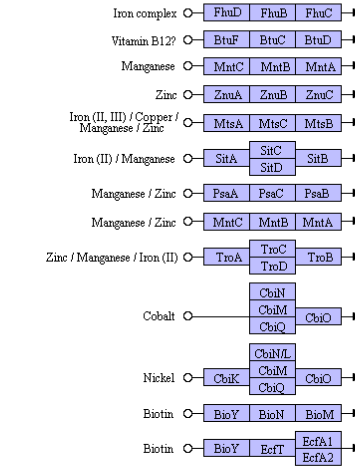

ABC-2 and other transporters

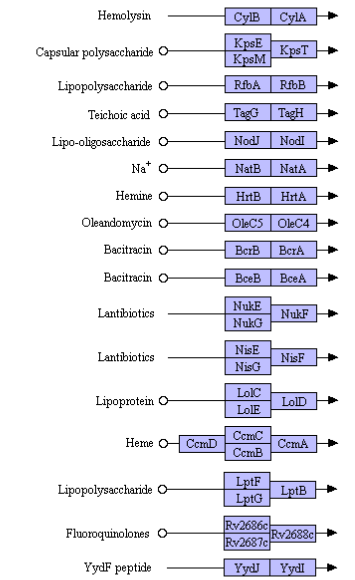

ABC-2 -type components without transporting function

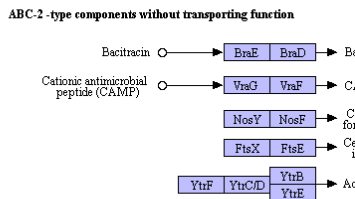

Eukaryotic-type ABC transporters

ABCA Subfamily

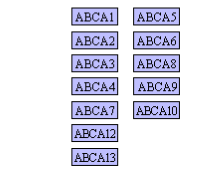

ABCB Subfamily

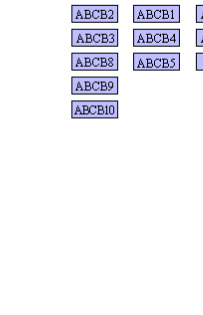

ABCC Subfamily

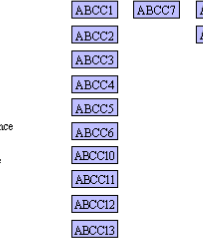

ABCD Subfamily

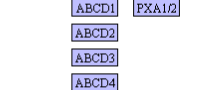

ABCG Subfamily

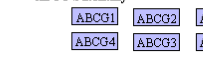

Macrolide exporters

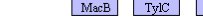

Other putative ABC transporters

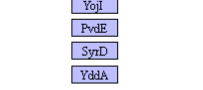

(c)

ABC TRANSPORTERS

Prokaryotic-type ABC transporters

Mineral and organic ion transporters

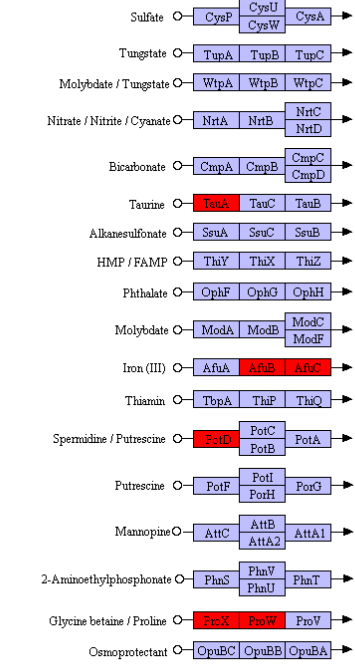

Oligosaccharide, polyol, and lipid transporters

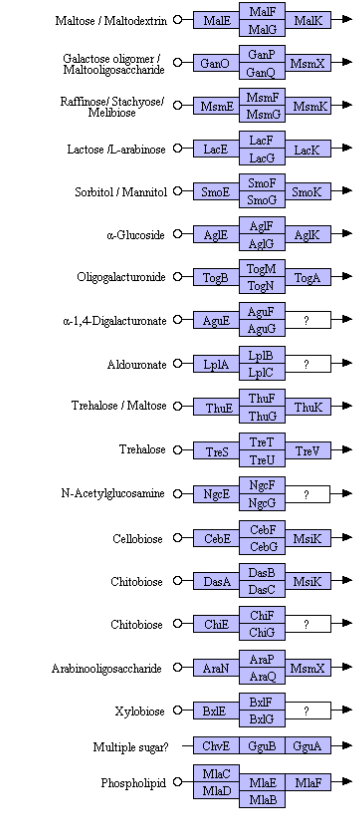

Monosaccharide transporters

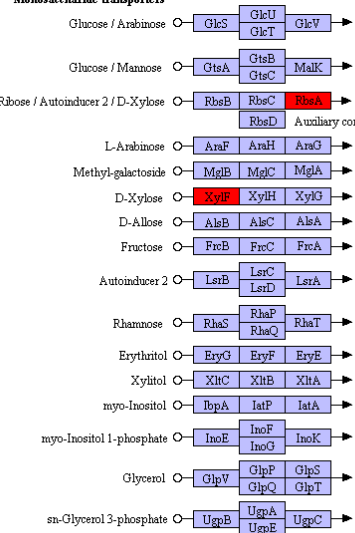

Phosphate and amino acid transporters

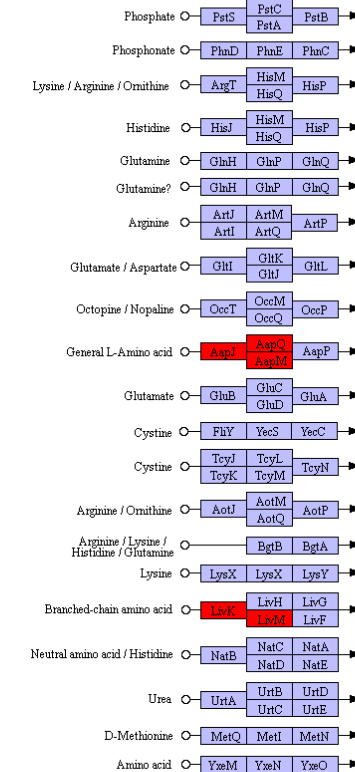

Peptide and nickel transporters

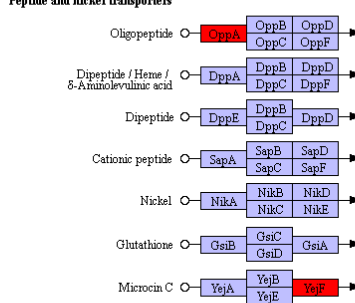

Metallic cation, iron-siderophore and vitamin B12 transporters

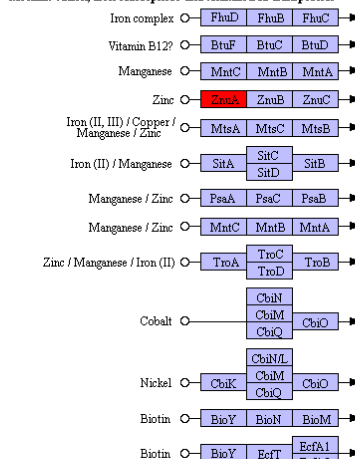

ABC-2 and other transporters

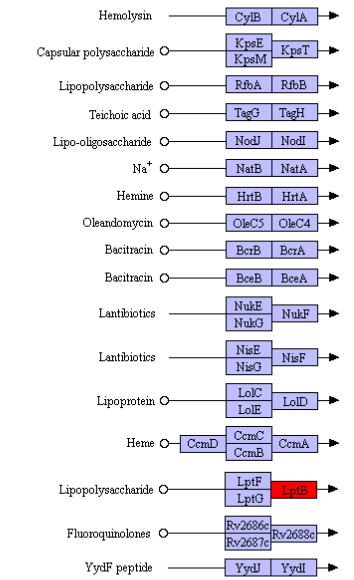

ABC-2 -type components without transporting function

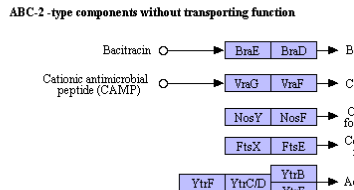

Eukaryotic-type ABC transporters

ABCA Subfamily

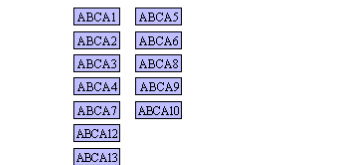

ABCB Subfamily

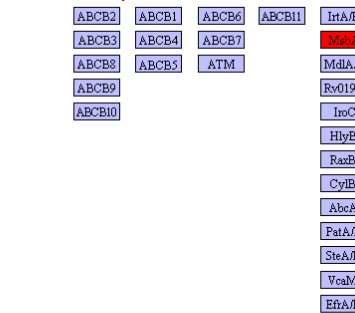

ABCC Subfamily

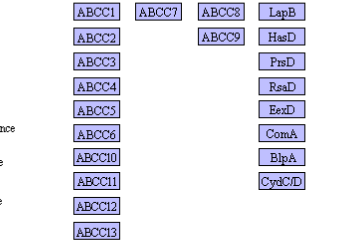

ABCD Subfamily

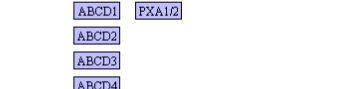

ABCG Subfamily

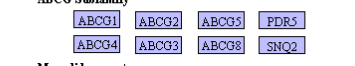

Macrolide exporters

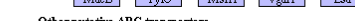

Other putative ABC transporters

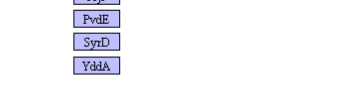

(d)

## ABC TRANSPORTERS

## Prokaryotic-type ABC transporters

## Mineral and organic ion transporters

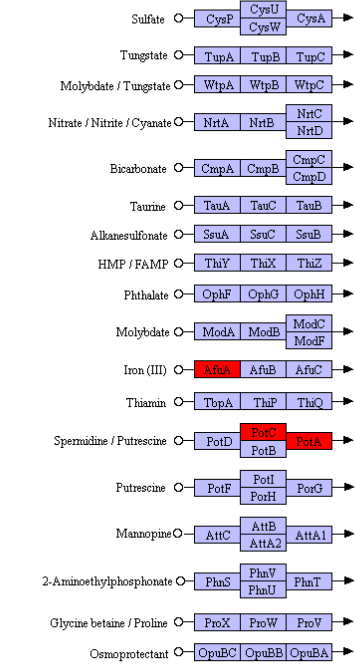

## Oligosaccharide, polyol, and lipid transporters

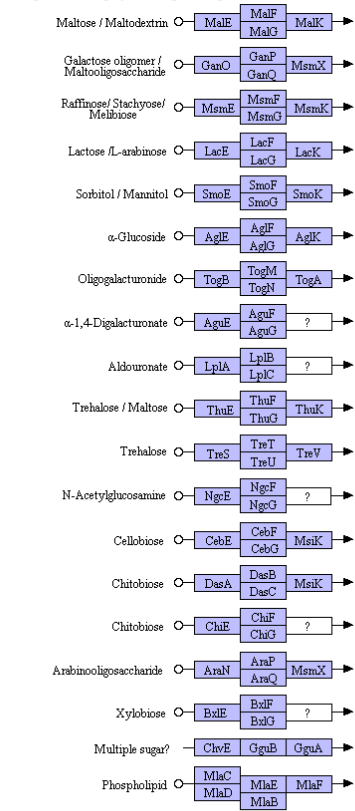

## Monosaccharide transporters

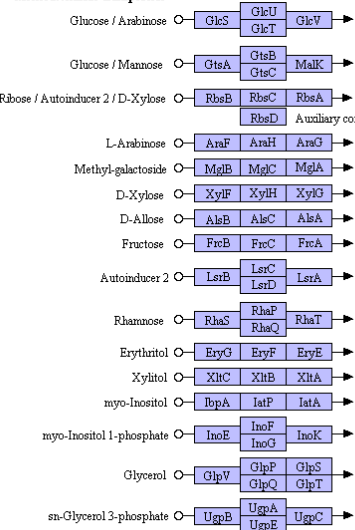

## Phosphate and amino acid transporters

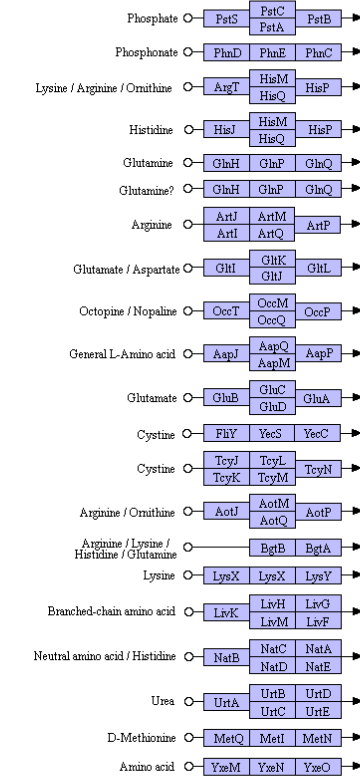

## Peptide and nickel transporters

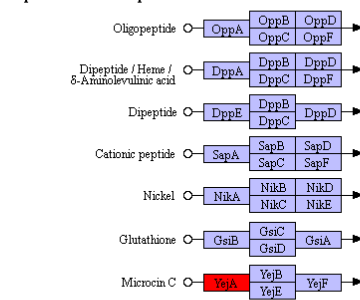

## Metallic cation, iron-siderophore and vitamin B12 transporters

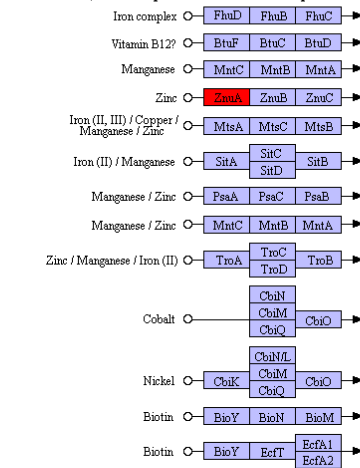

## ABC-2 and other transporters

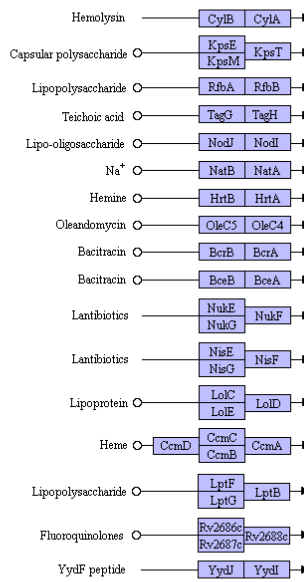

## ABC-2 -type components without transporting function

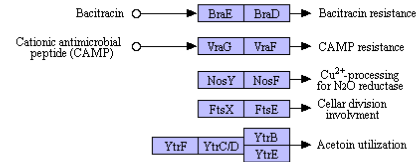

## Eukaryotic-type ABC transporters

## ABCA Subfamily

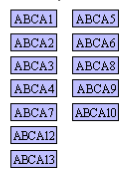

## ABCB Subfamily

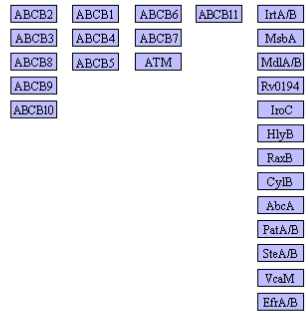

## ABCC Subfamily

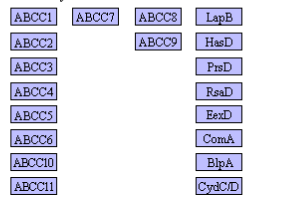

## ABCD Subfamily

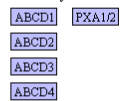

## ABCG Subfamily

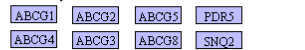

## Macrolide exporters

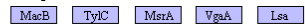

## Other putative ABC transporters

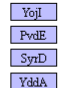

(e)

ABC TRANSPORTERS

Prokaryotic-type ABC transporters

Mineral and organic ion transporters

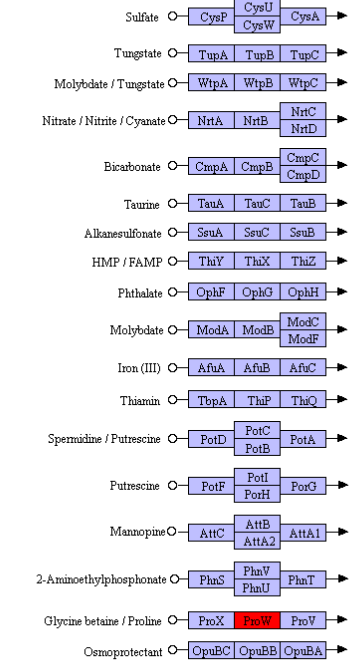

Oligosaccharide, polyol, and lipid transporters

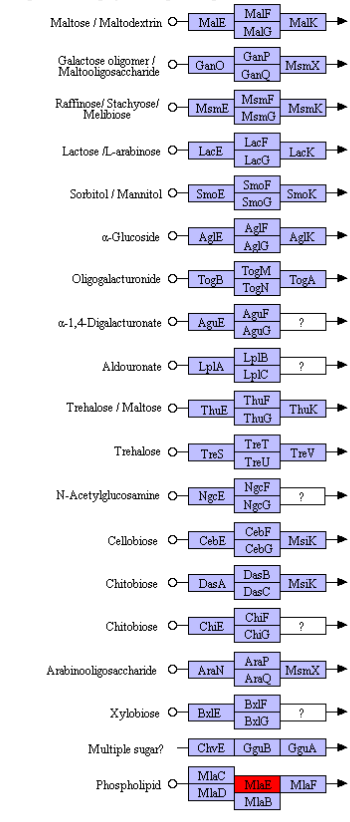

Monosaccharide transporters

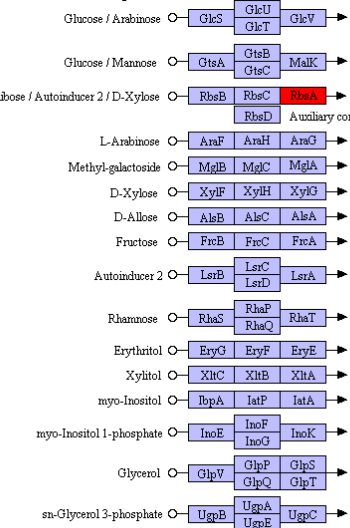

Phosphate and amino acid transporters

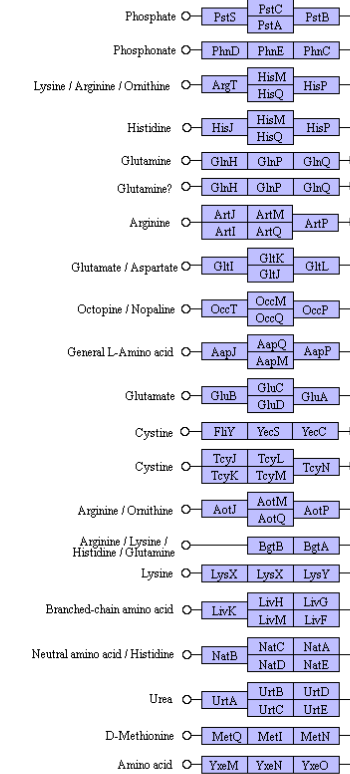

Peptide and nickel transporters

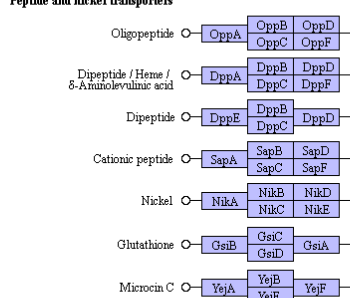

Metallic cation, iron-siderophore and vitamin B12 transporters

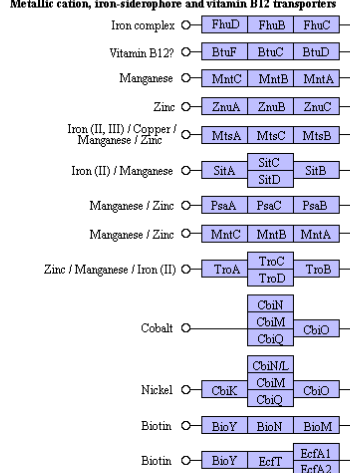

ABC-2 and other transporters

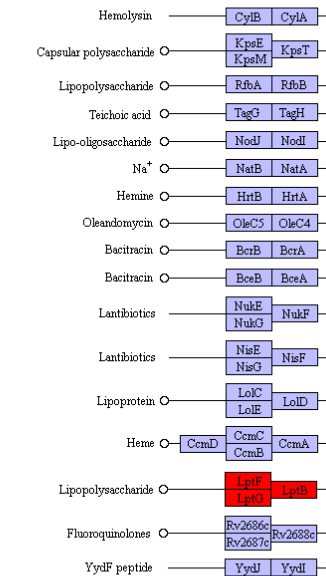

ABC-2 -type components without transporting function

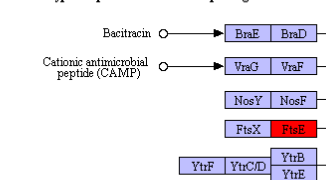

Eukaryotic-type ABC transporters

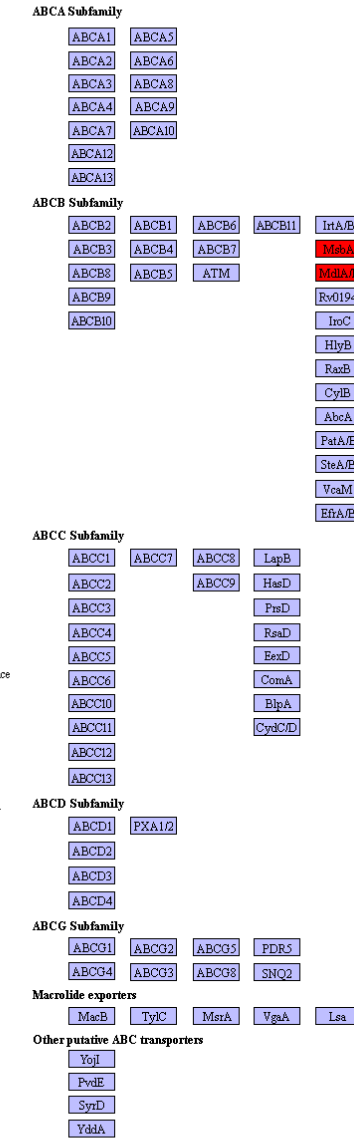

(f)

## ABC TRANSPORTERS

## Prokaryotic-type ABC transporters

## Mineral and organic ion transporters

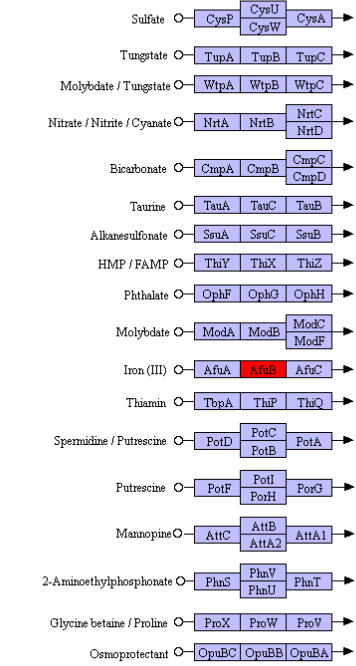

## Oligosaccharide, polyol, and lipid transporters

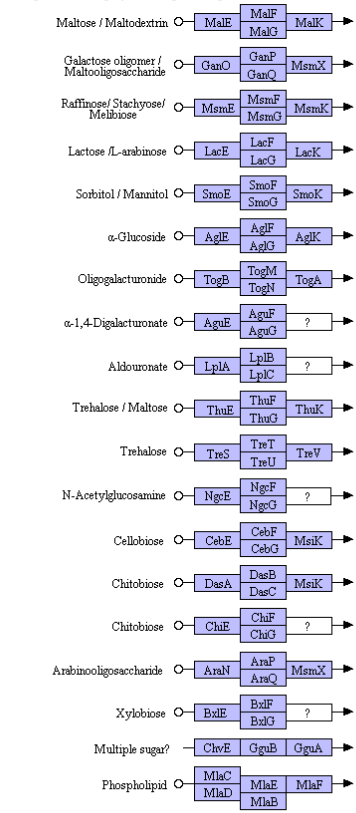

## Monosaccharide transporters

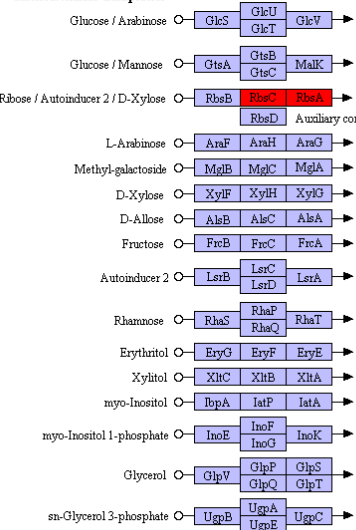

## Phosphate and amino acid transporters

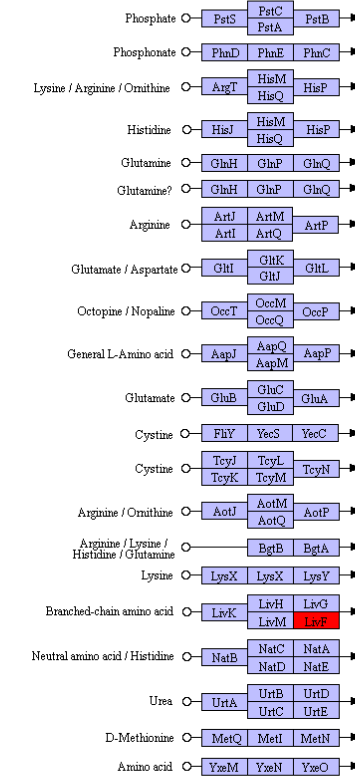

## Peptide and nickel transporters

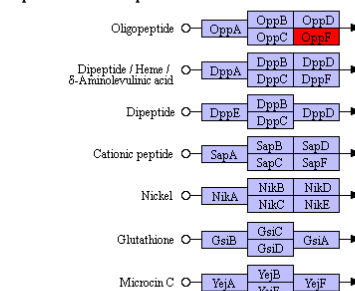

## Metallic cation, iron-siderophore and vitamin B12 transporters

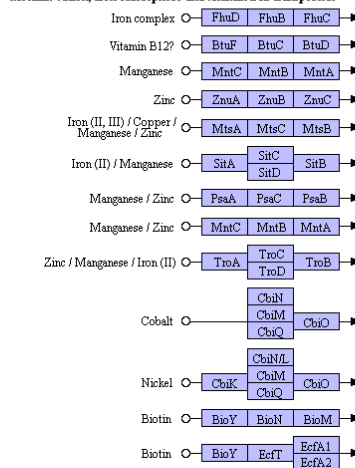

## ABC-2 and other transporters

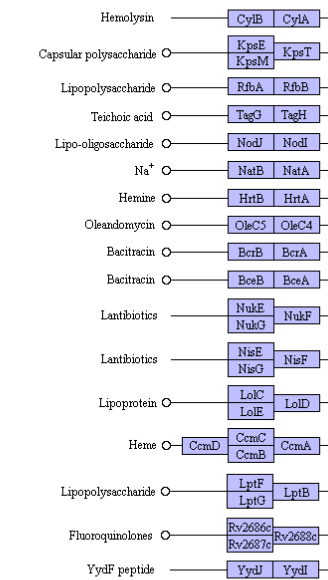

## ABC-2-type components without transporting function

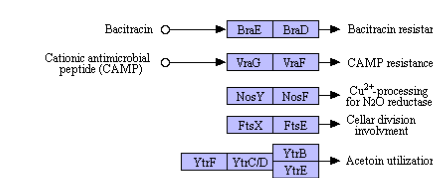

## Eukaryotic-type ABC transporters

## ABCA Subfamily

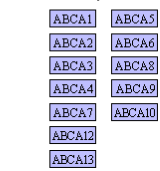

## ABCB Subfamily

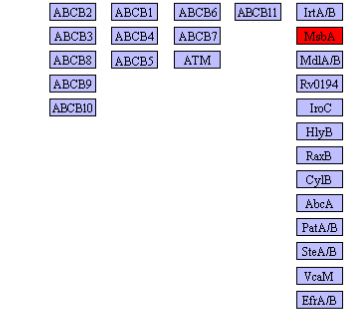

## ABCC Subfamily

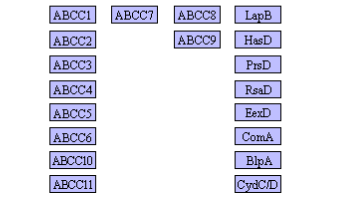

## ABCD Subfamily

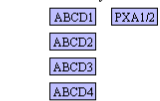

## ABCG Subfamily

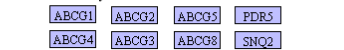

## Macrolide exporters

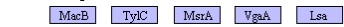

## Other putative ABC transporters

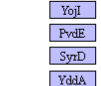

(g)

## ABC TRANSPORTERS

## Prokaryotic-type ABC transporters

## Mineral and organic ion transporters

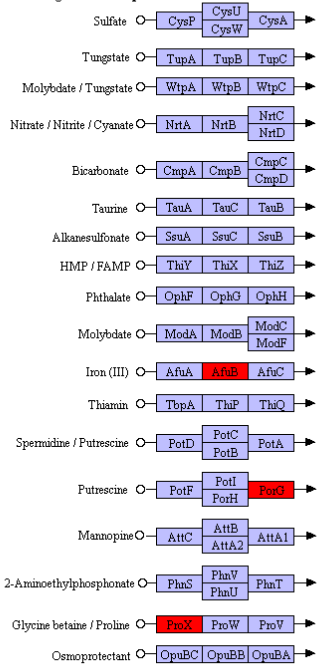

## Oligosaccharide, polyol, and lipid transporters

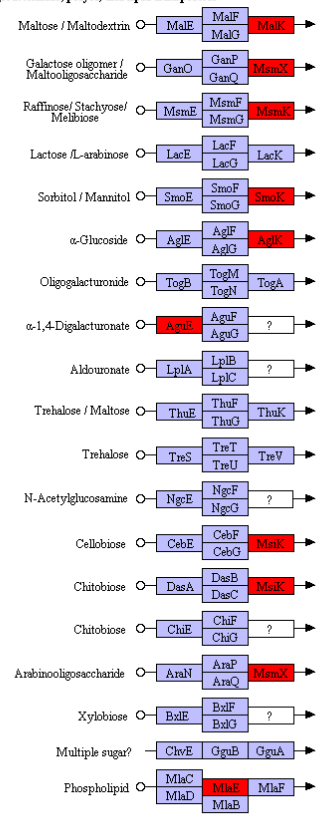

## Monosaccharide transporters

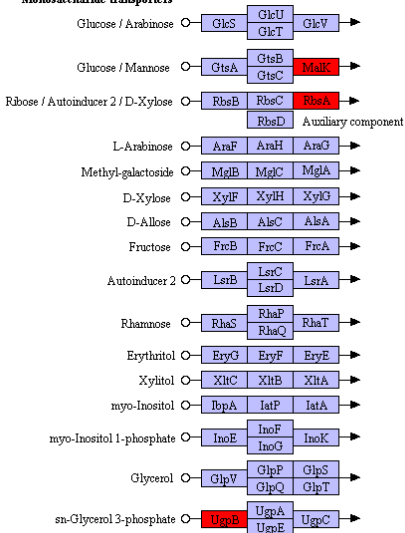

## Phosphate and amino acid transporters

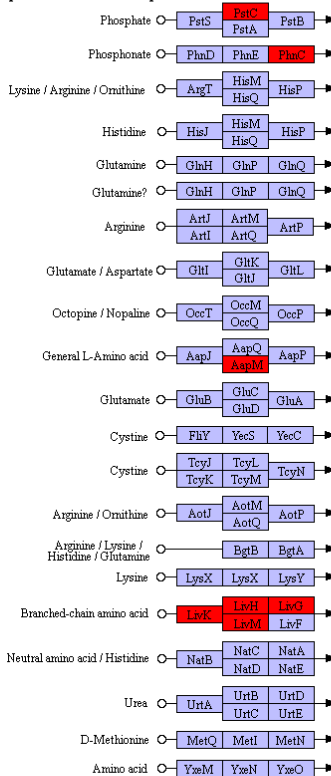

## Peptide and nickel transporters

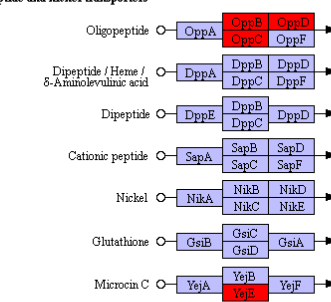

## Metallic cation, iron-siderophore and vitamin B12 transporters

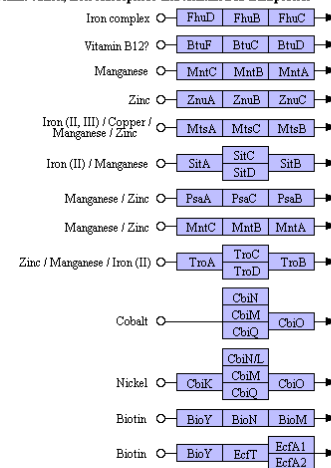

## ABC-2 and other transporters

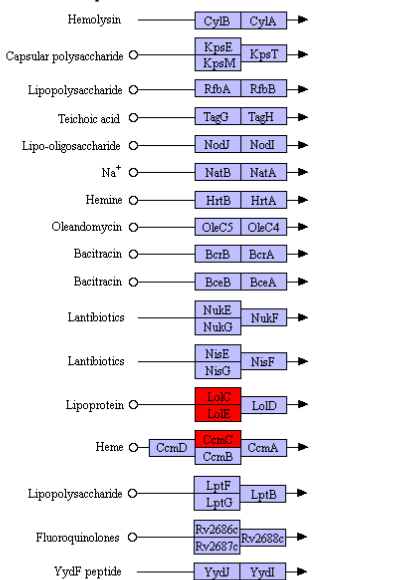

## ABC-2-type components without transporting function

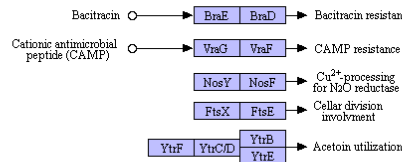

## Eukaryotic-type ABC transporters

## ABCA Subfamily

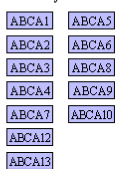

## ABCB Subfamily

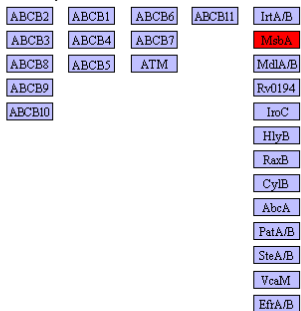

## ABCC Subfamily

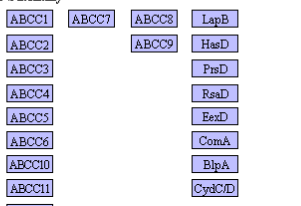

## ABCD Subfamily

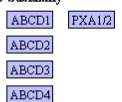

## ABCG Subfamily

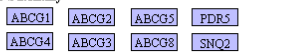

## Macrolide exporters

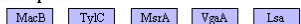

## Other putative ABC transporters

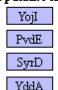

Supplement: MBO3-8-e00852-s004.pdf [file MBO3-8-e00852-s004.pdf]
