# Supplementary material for: Genomic ecology of Marine Group II, the most common marine planktonic Archaea across the surface ocean
Source: PubMed Central journal article supplement (PMC6741140; doi:10.1002/mbo3.852), 2019-07-02

**(a)** SULFUR METABOLISM

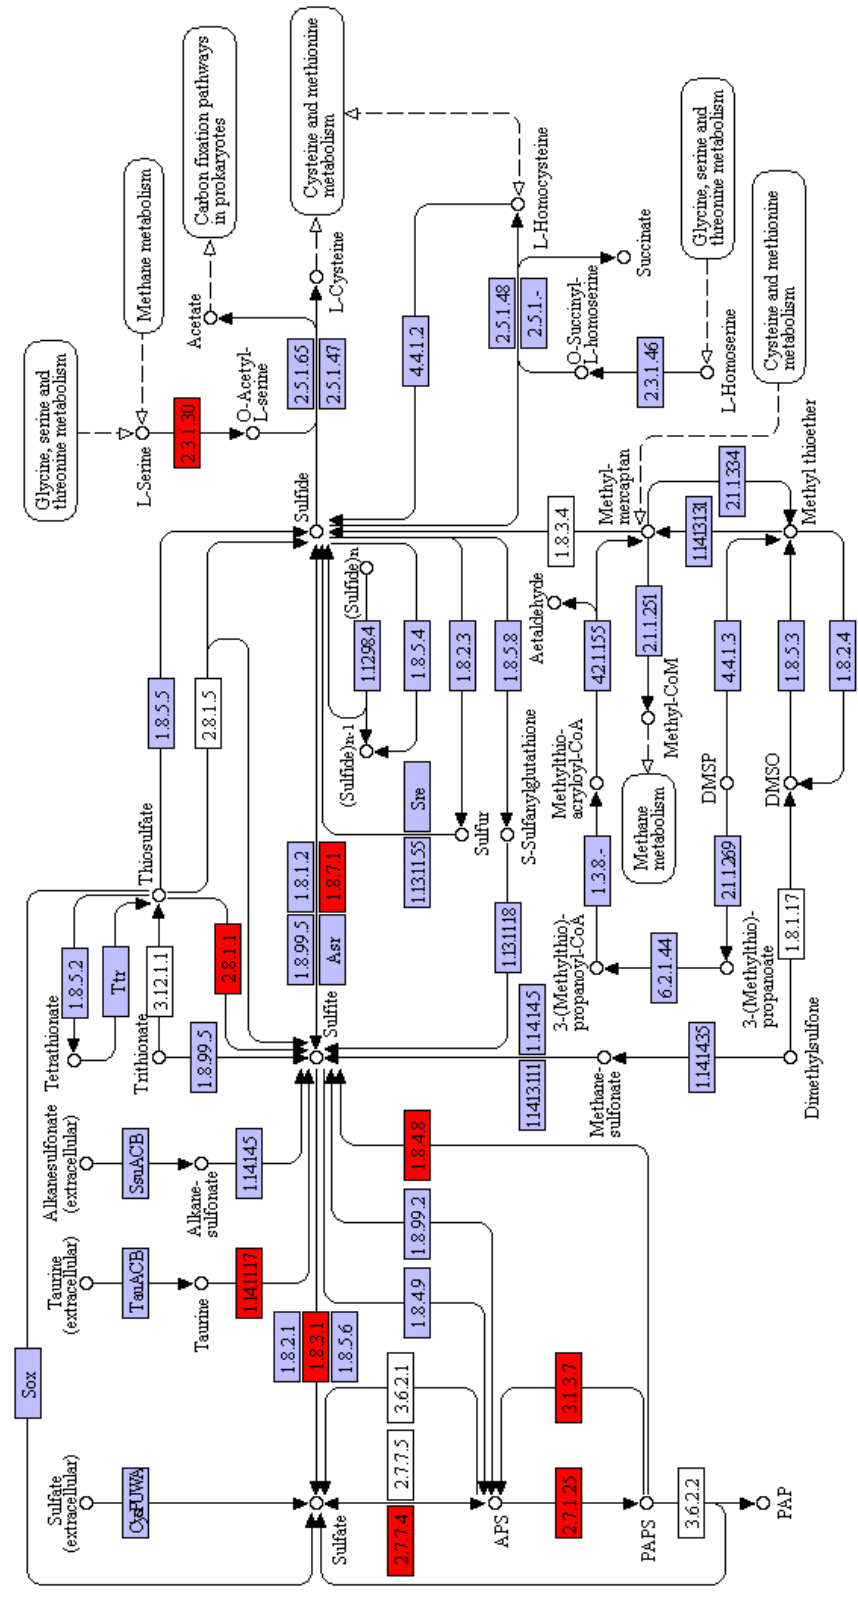

Oxidation state +6 +4 +2 -2

**Assimilatory sulfate reduction**

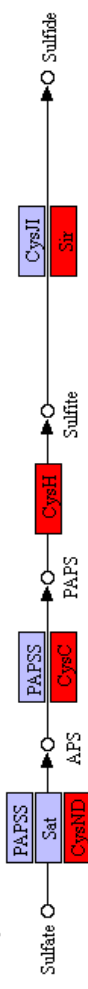

**Dissimilatory sulfate reduction and oxidation**

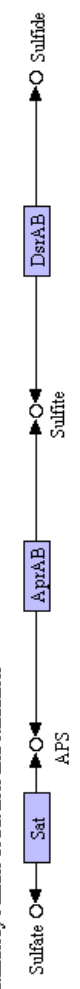

**SOX system**

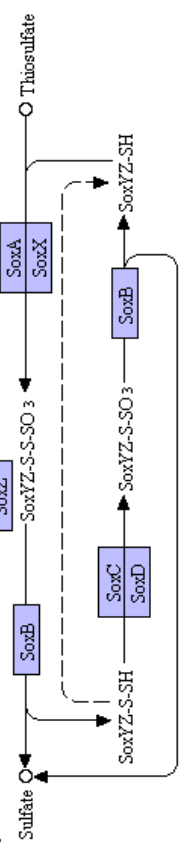

**(b)**  
**SULFUR METABOLISM**

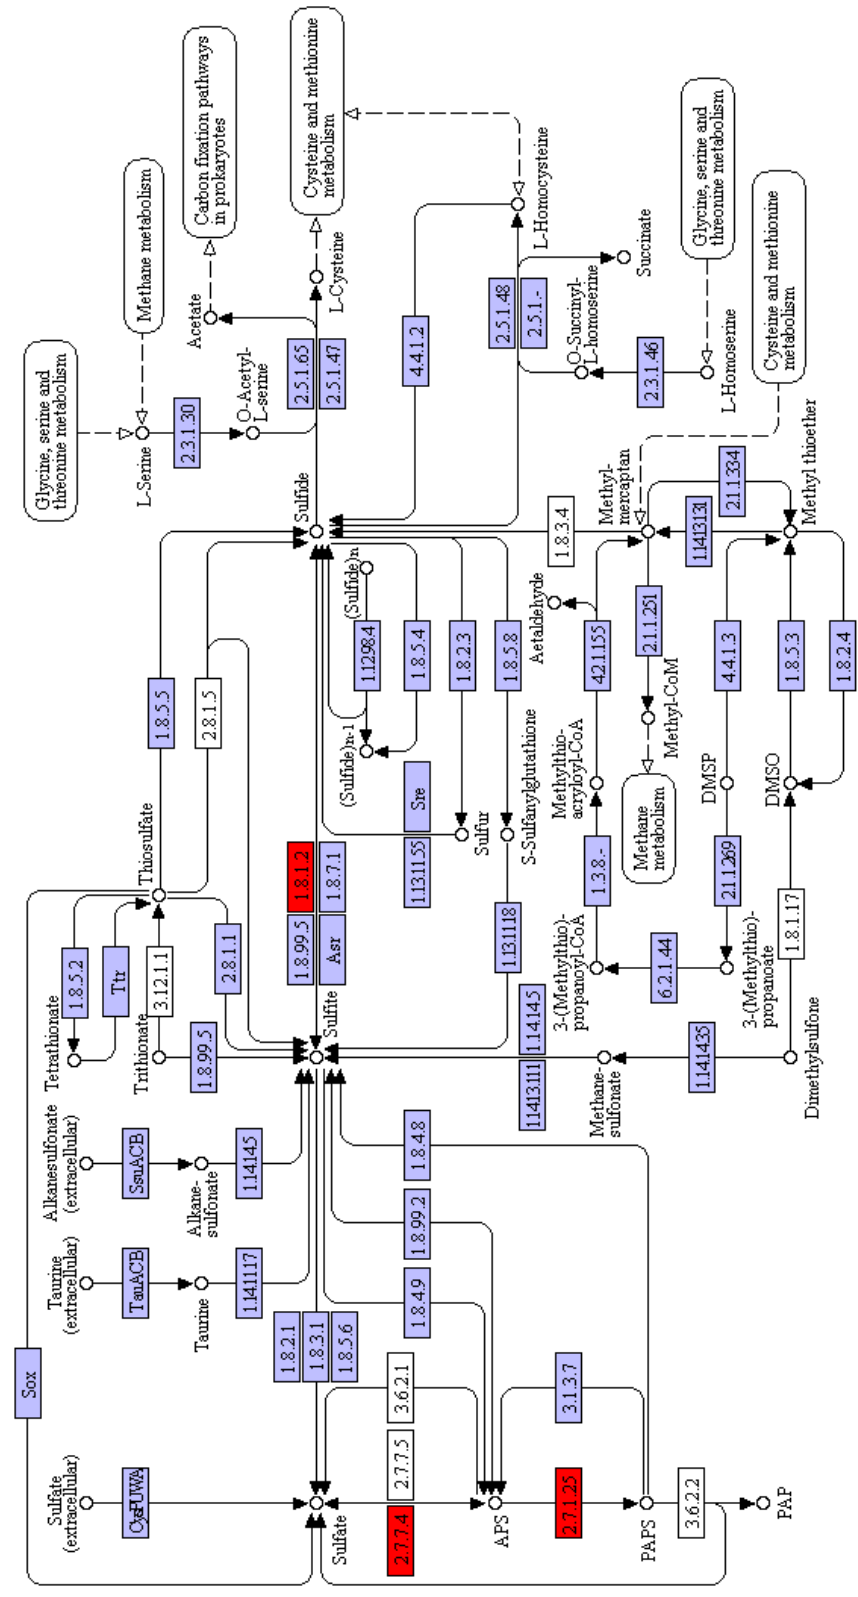

Oxidation state +6 +4 +2 -2

**Assimilatory sulfate reduction**

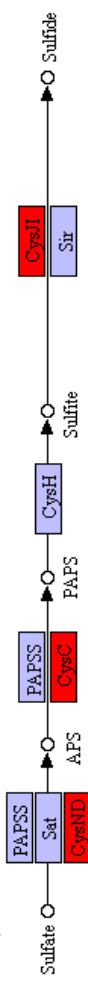

**Dissimilatory sulfate reduction and oxidation**



**SOX system**



(C) SULFUR METABOLISM

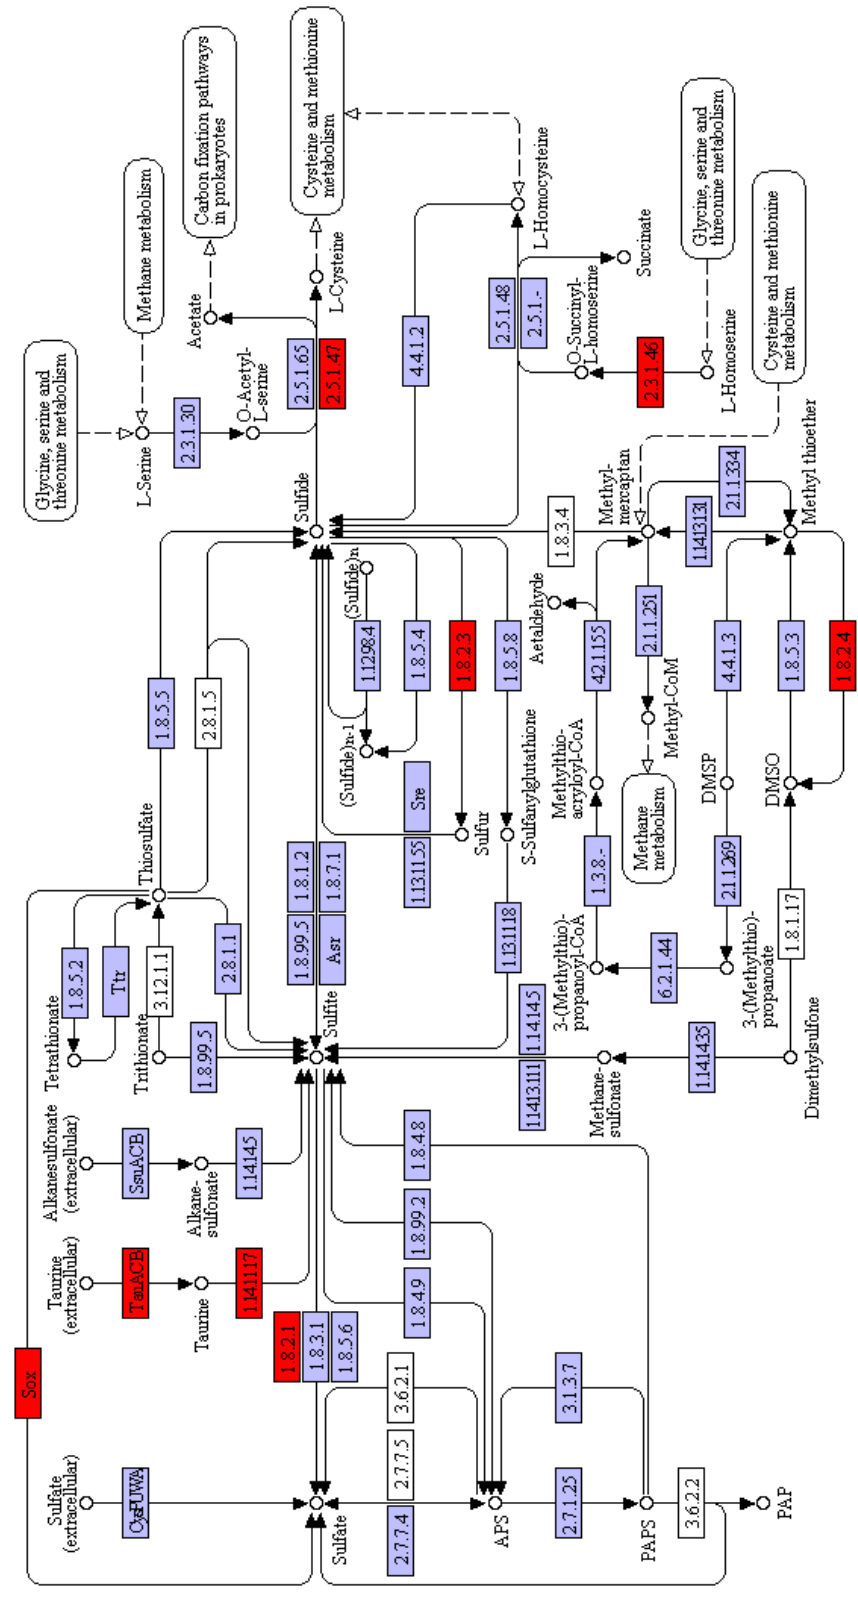

Oxidation state +6 +4 +2 -2

Assimilatory sulfate reduction

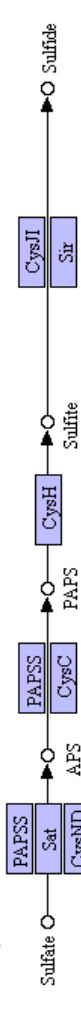

Dissimilatory sulfate reduction and oxidation

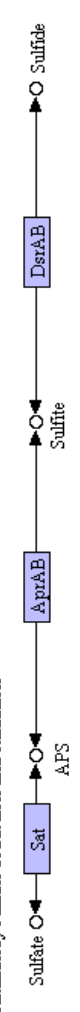

SOX system

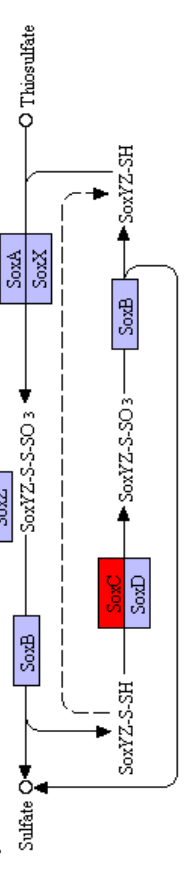

(d) SULFUR METABOLISM

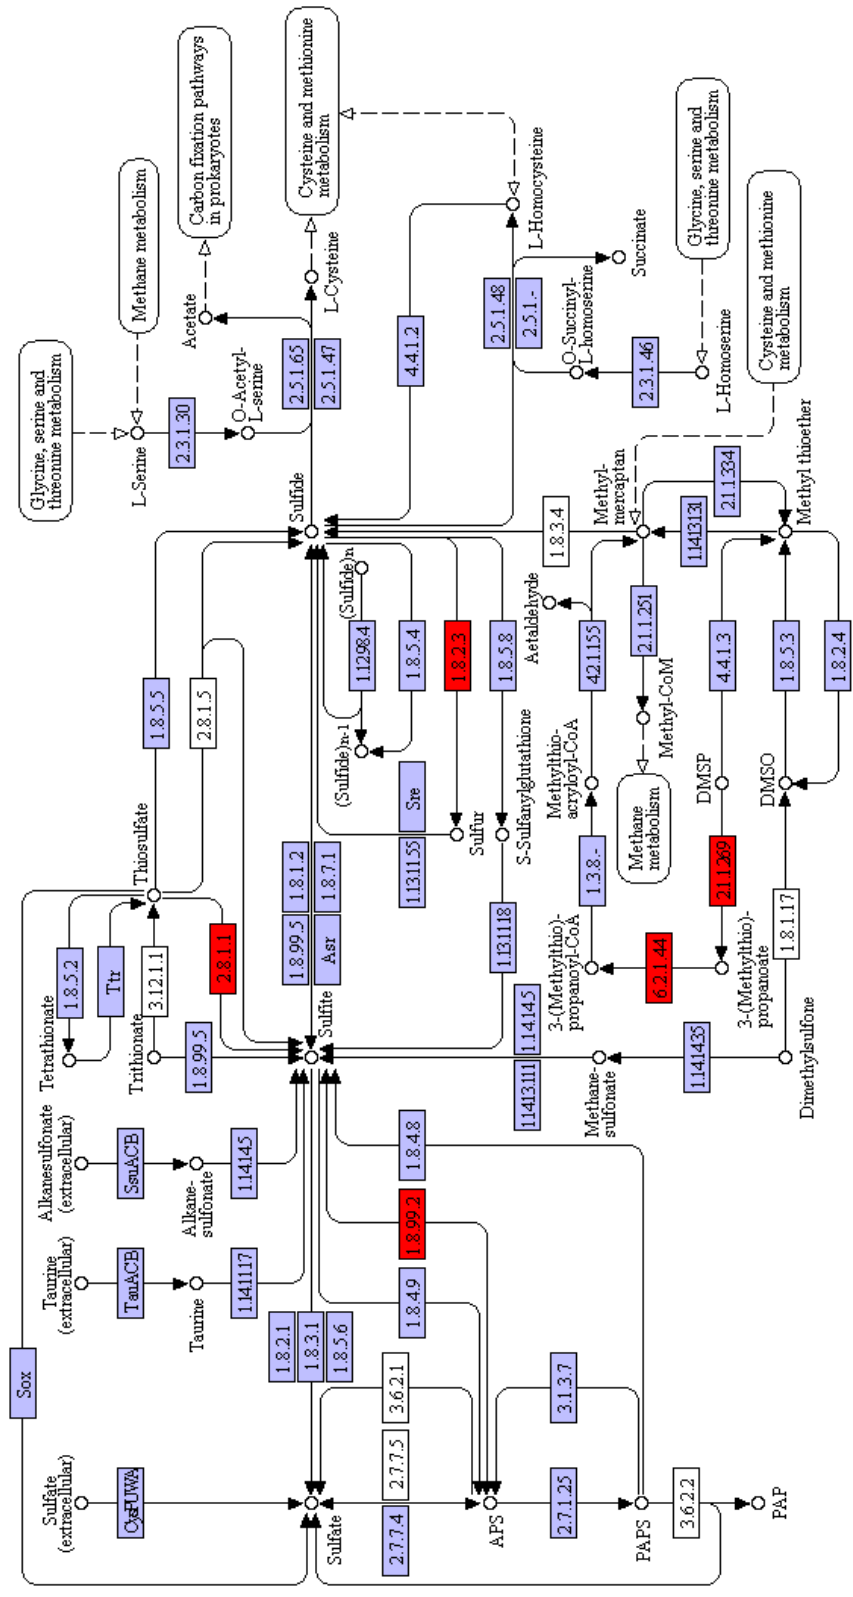

Oxidation state +6 +4 +2 -2

Assimilatory sulfate reduction

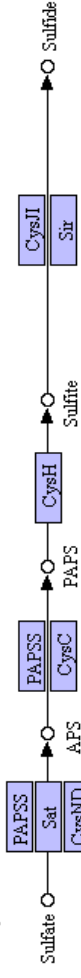

Dissimilatory sulfate reduction and oxidation

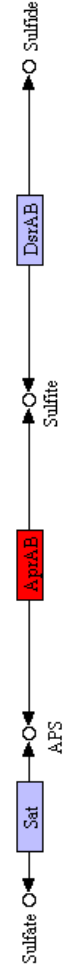

SOX system

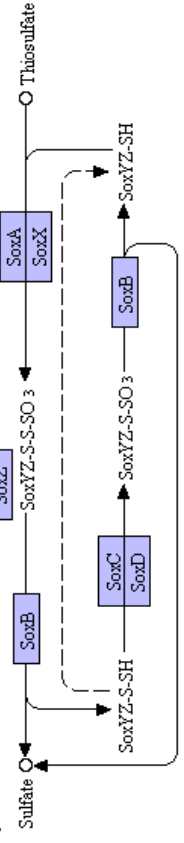

Supplement: MBO3-8-e00852-s005.pdf [file MBO3-8-e00852-s005.pdf]
