# Supplementary material for: Genomic ecology of Marine Group II, the most common marine planktonic Archaea across the surface ocean
Source: PubMed Central journal article supplement (PMC6741140; doi:10.1002/mbo3.852), 2019-07-02

- Marine Group IIa (*Ca.* Poseidoniaceae fam. nov.)
- Marine Group IIb (*Ca.* Thalassarchaeaceae fam. nov.)
- Other *Euryarchaea*

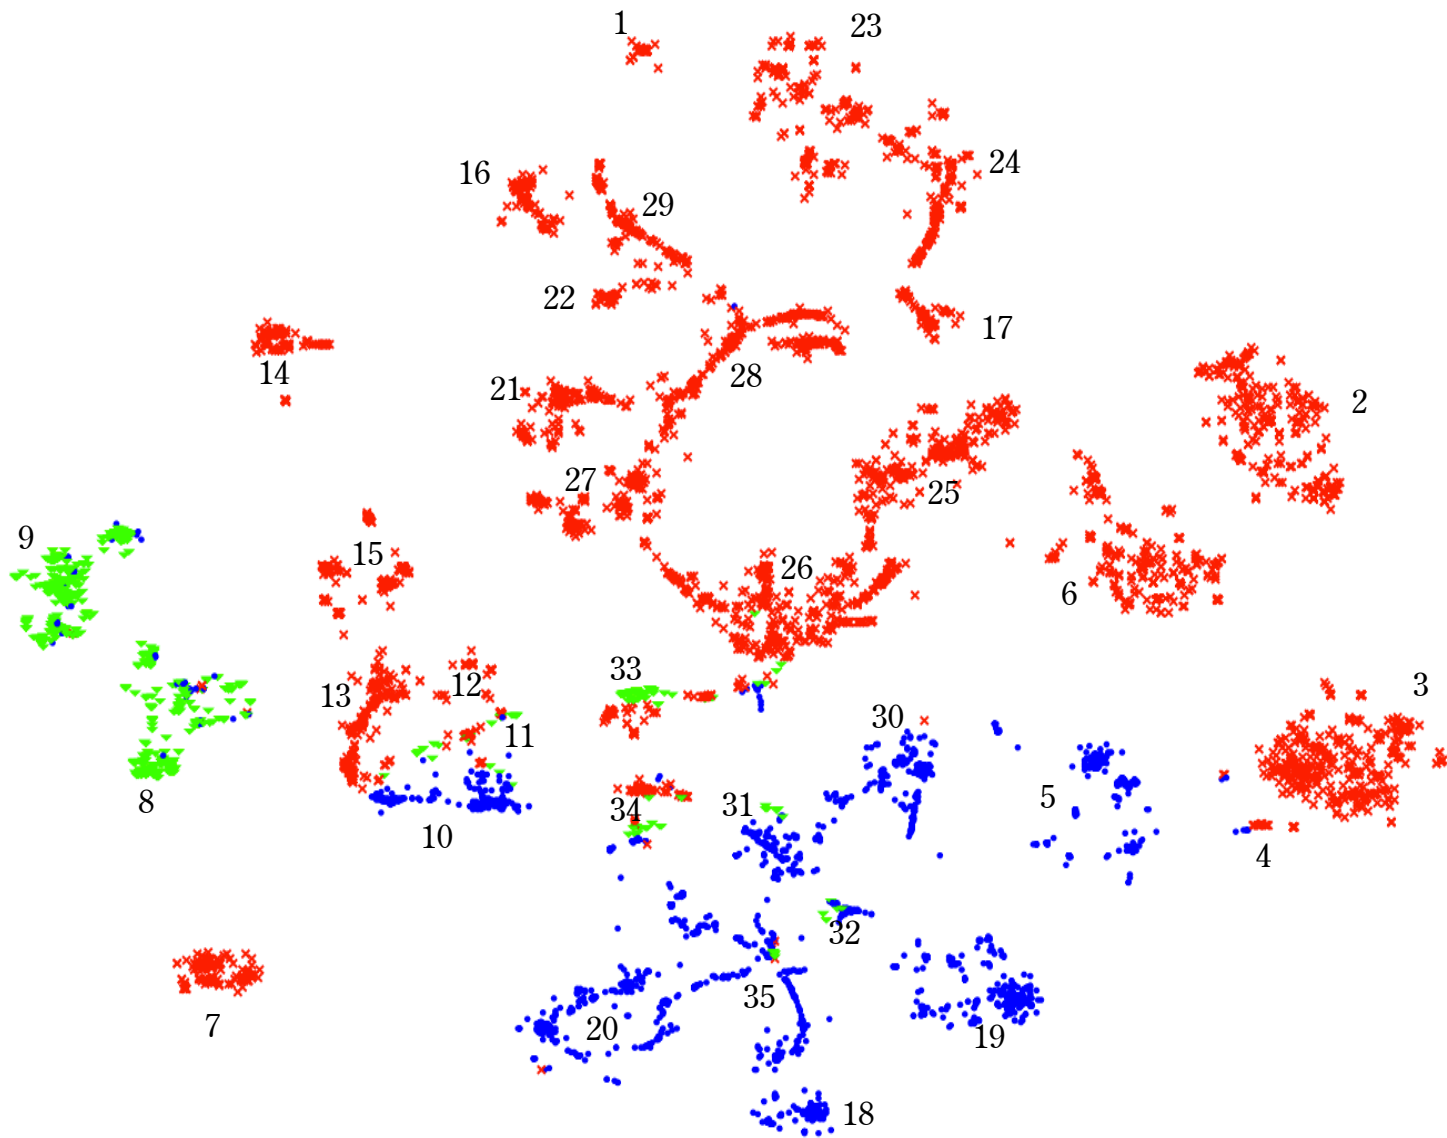

Supplement: MBO3-8-e00852-s002.pdf [file MBO3-8-e00852-s002.pdf]
