# Supplementary material for: Genomic ecology of Marine Group II, the most common marine planktonic Archaea across the surface ocean
Source: PubMed Central journal article supplement (PMC6741140; doi:10.1002/mbo3.852), 2019-07-02

BIOSYNTHESIS OF AMINO ACIDS

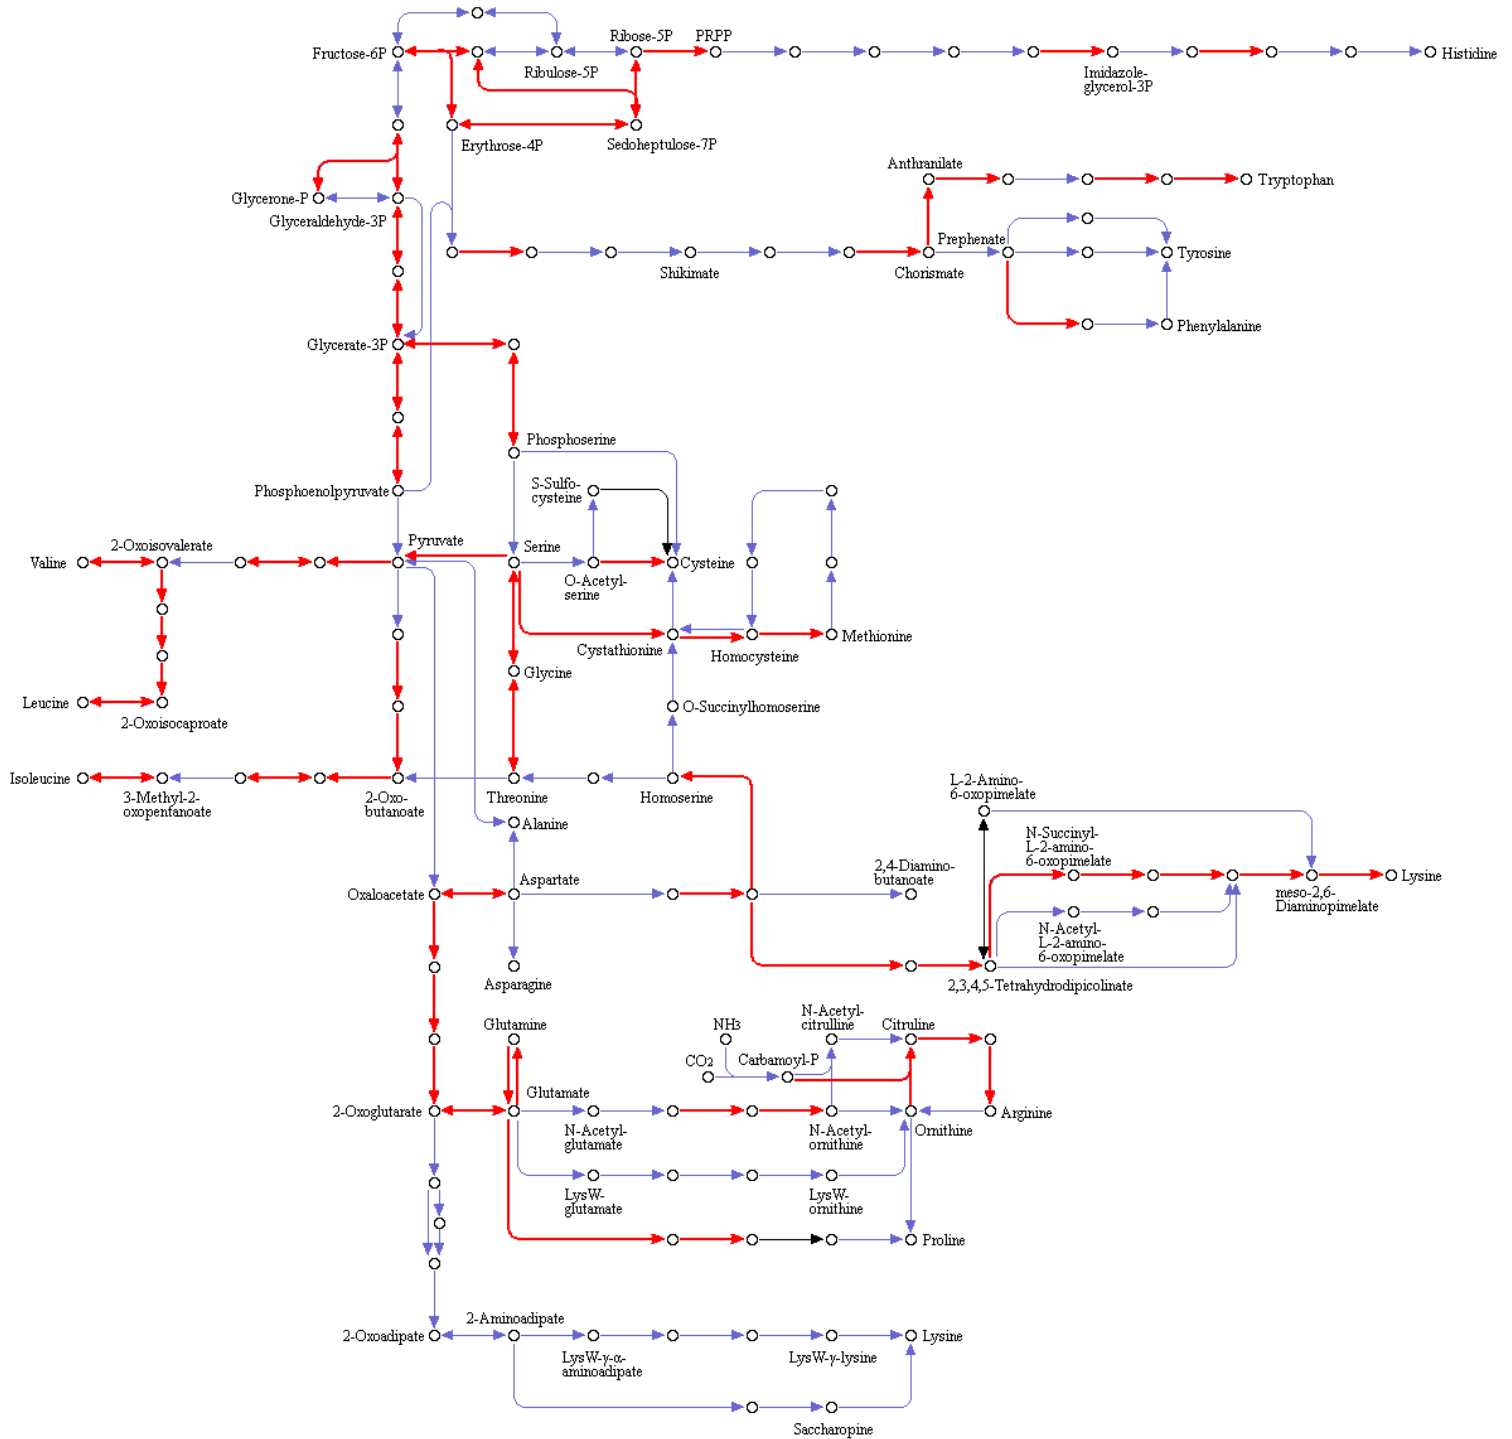

Supplement: MBO3-8-e00852-s006.pdf [file MBO3-8-e00852-s006.pdf]
